# Supplementary material
Source: MDPI journal article supplement (https://www.mdpi.com/2673-9992/8/1/7)
Supplement: s1 [file s1]

# Intrinsic (genotype) and extrinsic (environment) factors in the temporal patterns of nest-building process: Effect of forced isolation in old female mice with normal and AD-pathological aging of the Nest-building Process in Mice for Animal Welfare and Disease

Ana Ruiz de Molina García 1,2 and Lydia Giménez-Llort 1,2,

1. Institut de Neurociències, Universitat Autònoma de Barcelona, Spain; 2. Dept Psychiatry and Forensic Medicine, Universitat Autònoma de Barcelona, Spain

UAB  
Universitat Autònoma  
de Barcelona

## INTRODUCTION

- The impact of isolation has become a critical worldwide issue since the outbreak of the COVID-19 pandemic. In nursing homes, the physical distance measures forced the separation of old patients in restricted areas and rooms to avoid the spread of the virus. Similarly, older people living at home face severe restrictions as the best preventive strategy to protect their lives before vaccination is possible/effective.
- At the translational level, we recently demonstrated the impact of isolation [1] in male 3xTg-AD mice for Alzheimer's disease [2] and the increase of gross and fine motor activity. The latter was monitored through nesting [3,4], a species-typical ethological behavior used as a naturalistic approach to measuring animals' well-being [3,5] and abilities in instrumental tasks [6,7].

### REFERENCES:

- Muntsant, A.; Giménez-Llort, L. Impact of social isolation on the behavioral and functional profiles and hippocampal atrophy asymmetry in dementia in times of coronavirus pandemic (COVID-19): A translational neuroscience approach. *Front. Psychiatry*. 2020, 11, 572583.
- Oddo, S.; Caccamo, A.; Shepherd, J.D.; Murphy, M.P.; Golde, T.E.; Kaye, R.; Metherate, R.; Mattson, M.P.; Akbari, Y.; Laferla, F.M. Triple transgenic model of Alzheimer's disease with plaques and tangles: Intracellular A and synaptic dysfunction. *Neuron* 2003, 39, 409–421.
- Jirkof, P. Burrowing and nest building behavior as indicators of well-being in mice. *J. Neurosci. Methods* 2014, 234, 139–146.
- Olsson, I.A.; Dahlborn, K. Improving housing conditions for laboratory mice: A review of "environmental enrichment". *Lab Anim* 2002, 36, 243–270.
- Gaskill, B.; Pritchett-Corning, K.R. Nest building as an indicator of illness in laboratory mice. *J. Appl. Anim. Behav. Sci.* 2016, 180, 140–146.
- Deacon, R.M.J. Assessing nest building in mice. *Nat. Protoc.* 2006, 1, 1117–1119.
- Torres-Lista, V.; Giménez-Llort, L. Impairment of nesting behaviour in 3xTg-AD mice. *Behav. Brain Res.* 2013, 247, 153–157.

## AIMS

In the present work, we scored the nests and the nest-building process in old females under the effects of intrinsic (genotype, 3xTg-AD vs. C57BL/6J) and extrinsic (environment, forced isolation vs. social environment) factors.

## METHODS

For this purpose, nests of male and female mice with normal (C57BL/6) and AD-pathological aging were studied using paper nesting material and our 3-days protocol [7]. Nests were scored according to the ordinal Deacon Scale [6] (results not shown), whereas the temporal progress of nests construction was determined with a new proposed parametric measurement analog (Sciforum 045647: Measuring Temporal Patterns of the Nest-building Process in Mice for Animal Welfare and Disease Monitoring, Giménez-Llort and Ruiz de Molina-García, Proceedings), analyzed with free software Kinovea 5.0 for determination of N1 (size of the nest at 24h), N2 (size at 48h), and N3 (size at 72h). Results are expressed as mean  $\pm$  SEM. SPSS 15.0. The size of nests was analyzed with RM repeated-measures ANOVA with genotype and sex as between factors, day as within factor. One-way analysis of variance (ANOVA) followed by Bonferroni's post-hoc test and paired t-test were also used. Statistical significance:  $p < 0.05$ . The protocol CEEAH 3588/DMAH 9452 was approved the 8th of March 2019 by Departament de Medi Ambient i Habitatge, Generalitat de Catalunya.

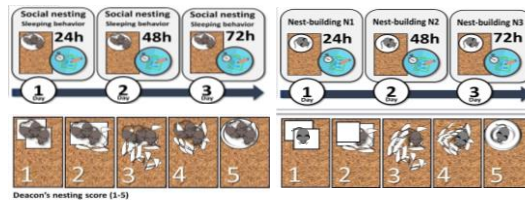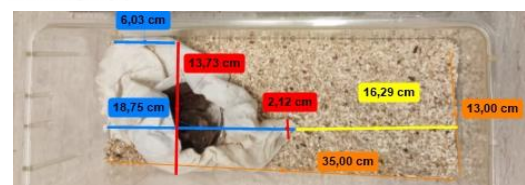

Nest size: A new, parametric, nesting score (see Sciforum-045647)

## RESULTS

- The results confirmed previously described[7] genotype differences, with worse nests in 3xTg-AD mice living under standard housing conditions than non-transgenic counterparts. (RM ANOVA N1N2N3 - Genotype/Social  $F=10.12$ ;  $p=.004$ ; $**$ ) at 48 and 72 hours (RM ANOVA N1 - Genotype/Social (RM ANOVA N2 - Genotype/Social  $F=7.57$ ;  $p=.01$ , \*) (RM ANOVA N3 - Genotype/Social  $F=14.9$ ;  $p=.001$ ; $**$ )
- However, the genotype effect was lost under isolation, mainly due to isolated 3xTg-AD females enhancing nest-building behavior, while isolated non-transgenic counterparts were less efficient at 24h.

(Only NT-RM ANOVA N1N2N3 - Day/Social Lineal  $F=3.71$ ,  $p=.076$ ; Quadratic,  $F=4.5$ ,  $p=.054$ ) (Only 3xTg-RM ANOVA N1N2N3 - Day/Social Lineal  $F=193$ ,  $p=.667$ ,  $n.s.$  Quadratic,  $F=.118$ ,  $p=.736$ ,  $n.s.$ )

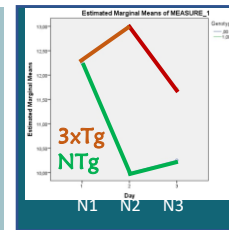

Fig 1. Time course representation of the nest size (cm) in the 3-day nest protocol [4]. Nesting on day 1 (N1), day 2 (N2) and day 3 (N3) based on genotype (3xTg/NTg).

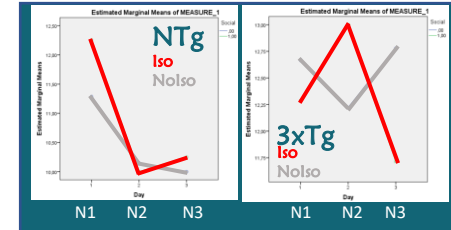

Fig 2. Time course representation of the nest size (cm) in the 3-day nest protocol [4]. Nesting on day 1 (N1), day 2 (N2) and day 3 (N3) based on social condition (Isolated/No Isolated).

### 1. Sample: All / Genotype effect

| Source            | Type III Sum of Squares | df | Mean Square | F        | Sig. | Partial Eta Squared | Noncent. Parameter | Observed Power <sup>a</sup> |
|-------------------|-------------------------|----|-------------|----------|------|---------------------|--------------------|-----------------------------|
| Intercept         | 12270.158               | 1  | 12270.158   | 1685.363 | .000 | .984                | 1685.363           | 1.000                       |
| Genotype          | 73.856                  | 1  | 73.856      | 10.117   | .004 | .273                | 10.117             | .966                        |
| Social            | .105                    | 1  | .105        | .014     | .905 | .001                | .014               | .052                        |
| Genotype * Social | 1.930                   | 1  | 1.930       | .265     | .611 | .010                | .265               | .079                        |
| Error             | 186.571                 | 27 | 6.910       |          |      |                     |                    |                             |
| Total             | 12457.664               | 29 |             |          |      |                     |                    |                             |

a. Computed using alpha = .05

### 2. Sample: Genotype/Social effect

#### Sample: Only NTg

| Source       | Type III Sum of Squares | df | Mean Square | F     | Sig. | Partial Eta Squared | Noncent. Parameter | Observed Power <sup>a</sup> |
|--------------|-------------------------|----|-------------|-------|------|---------------------|--------------------|-----------------------------|
| Day          | 20.152                  | 1  | 20.152      | 3.705 | .076 | .222                | 3.705              | .438                        |
| Linear       | 7.822                   | 1  | 7.822       | 1.404 | .242 | .054                | 1.404              | .502                        |
| Quadratic    | .952                    | 1  | .952        | .175  | .682 | .013                | .175               | .067                        |
| Day * Social | 1.400                   | 1  | 1.400       | .257  | .613 | .080                | .257               | .135                        |
| Error(Day)   | 70.714                  | 13 | 5.440       |       |      |                     |                    |                             |
| Total        | 22.000                  | 13 | 1.692       |       |      |                     |                    |                             |

a. Computed using alpha = .05

#### Sample: Only 3xTg

| Source     | Type III Sum of Squares | df | Mean Square | F    | Sig. | Partial Eta Squared | Noncent. Parameter | Observed Power <sup>a</sup> |
|------------|-------------------------|----|-------------|------|------|---------------------|--------------------|-----------------------------|
| Day        | .417                    | 1  | .417        | .193 | .667 | .014                | .193               | .088                        |
| Linear     | .888                    | 1  | .888        | .418 | .520 | .009                | .418               | .082                        |
| Quadratic  | .001                    | 1  | .001        | .004 | .854 | .001                | .004               | .000                        |
| Error(Day) | 1.900                   | 13 | .146        |      |      |                     |                    |                             |
| Total      | 2.406                   | 14 | .172        |      |      |                     |                    |                             |

a. Computed using alpha = .05

| Pair           | N  | Correlation | Sig. |
|----------------|----|-------------|------|
| Pair 1 N2 & N1 | 16 | .363        | .167 |
| Pair 2 N3 & N2 | 16 | .387        | .138 |
| Pair 3 N3 & N1 | 16 | .491        | .053 |

### Sample: All / Genotype effect N1

| Source            | Type III Sum of Squares | df | Mean Square | F       | Sig. | Partial Eta Squared | Noncent. Parameter | Observed Power <sup>a</sup> |
|-------------------|-------------------------|----|-------------|---------|------|---------------------|--------------------|-----------------------------|
| Corrected Model   | 7.936 <sup>a</sup>      | 3  | 2.612       | .445    | .723 | .047                | 1.336              | .127                        |
| Intercept         | 4505.521                | 1  | 4505.521    | 768.194 | .000 | .966                | 768.194            | 1.000                       |
| Genotype          | 3.846                   | 1  | 3.846       | .656    | .425 | .024                | .656               | .122                        |
| Social            | .652                    | 1  | .652        | .111    | .741 | .004                | .111               | .062                        |
| Genotype * Social | 3.468                   | 1  | 3.468       | .591    | .449 | .021                | .591               | .115                        |
| Error             | 158.357                 | 27 | 5.865       |         |      |                     |                    |                             |
| Total             | 4751.000                | 31 |             |         |      |                     |                    |                             |
| Corrected Total   | 166.194                 | 30 |             |         |      |                     |                    |                             |

a. R Squared = .047 (Adjusted R Squared = -.059)

b. Computed using alpha = .05

### Sample: All / Genotype effect N2

| Source            | Type III Sum of Squares | df | Mean Square | F       | Sig. | Partial Eta Squared | Noncent. Parameter | Observed Power <sup>a</sup> |
|-------------------|-------------------------|----|-------------|---------|------|---------------------|--------------------|-----------------------------|
| Corrected Model   | 50.684 <sup>a</sup>     | 3  | 16.895      | 2.586   | .074 | .223                | 2.586              | .576                        |
| Intercept         | 3943.830                | 1  | 3943.830    | 603.654 | .000 | .967                | 603.654            | 1.000                       |
| Genotype          | 49.442                  | 1  | 49.442      | 7.567   | .010 | .219                | 7.567              | .756                        |
| Social            | .773                    | 1  | .773        | .118    | .734 | .004                | .118               | .063                        |
| Genotype * Social | 1.624                   | 1  | 1.624       | .249    | .622 | .009                | .249               | .077                        |
| Error             | 176.413                 | 27 | 6.534       |         |      |                     |                    |                             |
| Total             | 4224.000                | 31 |             |         |      |                     |                    |                             |
| Corrected Total   | 227.097                 | 30 |             |         |      |                     |                    |                             |

a. R Squared = .223 (Adjusted R Squared = .137)

b. Computed using alpha = .05

### Sample: Genotype effect N3

| Source            | Type III Sum of Squares | df | Mean Square | F        | Sig. | Partial Eta Squared | Noncent. Parameter | Observed Power <sup>a</sup> |
|-------------------|-------------------------|----|-------------|----------|------|---------------------|--------------------|-----------------------------|
| Corrected Model   | 41.451 <sup>a</sup>     | 3  | 13.817      | 5.971    | .003 | .399                | 17.912             | .825                        |
| Intercept         | 3836.249                | 1  | 3836.249    | 1657.681 | .000 | .984                | 1657.681           | 1.000                       |
| Genotype          | 34.485                  | 1  | 34.485      | 14.901   | .001 | .356                | 14.901             | .961                        |
| Social            | 1.268                   | 1  | 1.268       | .548     | .466 | .020                | .548               | .110                        |
| Genotype * Social | 3.566                   | 1  | 3.566       | 1.429    | .242 | .050                | 1.429              | .211                        |
| Error             | 62.484                  | 27 | 2.314       |          |      |                     |                    |                             |
| Total             | 4033.000                | 31 |             |          |      |                     |                    |                             |
| Corrected Total   | 103.935                 | 30 |             |          |      |                     |                    |                             |

a. R Squared = .399 (Adjusted R Squared = .332)

b. Computed using alpha = .05

## CONCLUSIONS

Temporal patterns of the nest-building process are important to be considered when measuring the effects of intrinsic and extrinsic factors.
